# Supplementary material
Source: MDPI journal article supplement (https://www.mdpi.com/2673-4591/16/1/15)

# Development of Electrochemical Sensors Based on Electrosynthesized Ion Imprinted Polymers for Cobalt ( $\text{Co}^{2+}$ ) Ions Determination in Water

Nelson Manrique-Rodríguez, Sabrina Di Masi\* and Cosimino Malitesta

Laboratorio di Chimica Analitica, Dipartimento di Scienze e Tecnologie Biologiche ed Ambientali,  
Lecce, Italia.

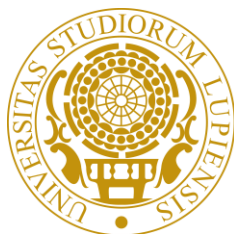

UNIVERSITÀ  
DEL SALENTO

L'Ateneo tra i due mari

# CONTENT

- ✓ INTRODUCTION
- ✓ OBJECTIVE
- ✓ METHODS
- ✓ RESULTS
- ✓ CONCLUSIONS

# INTRODUCTION

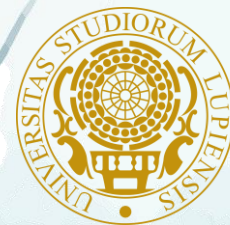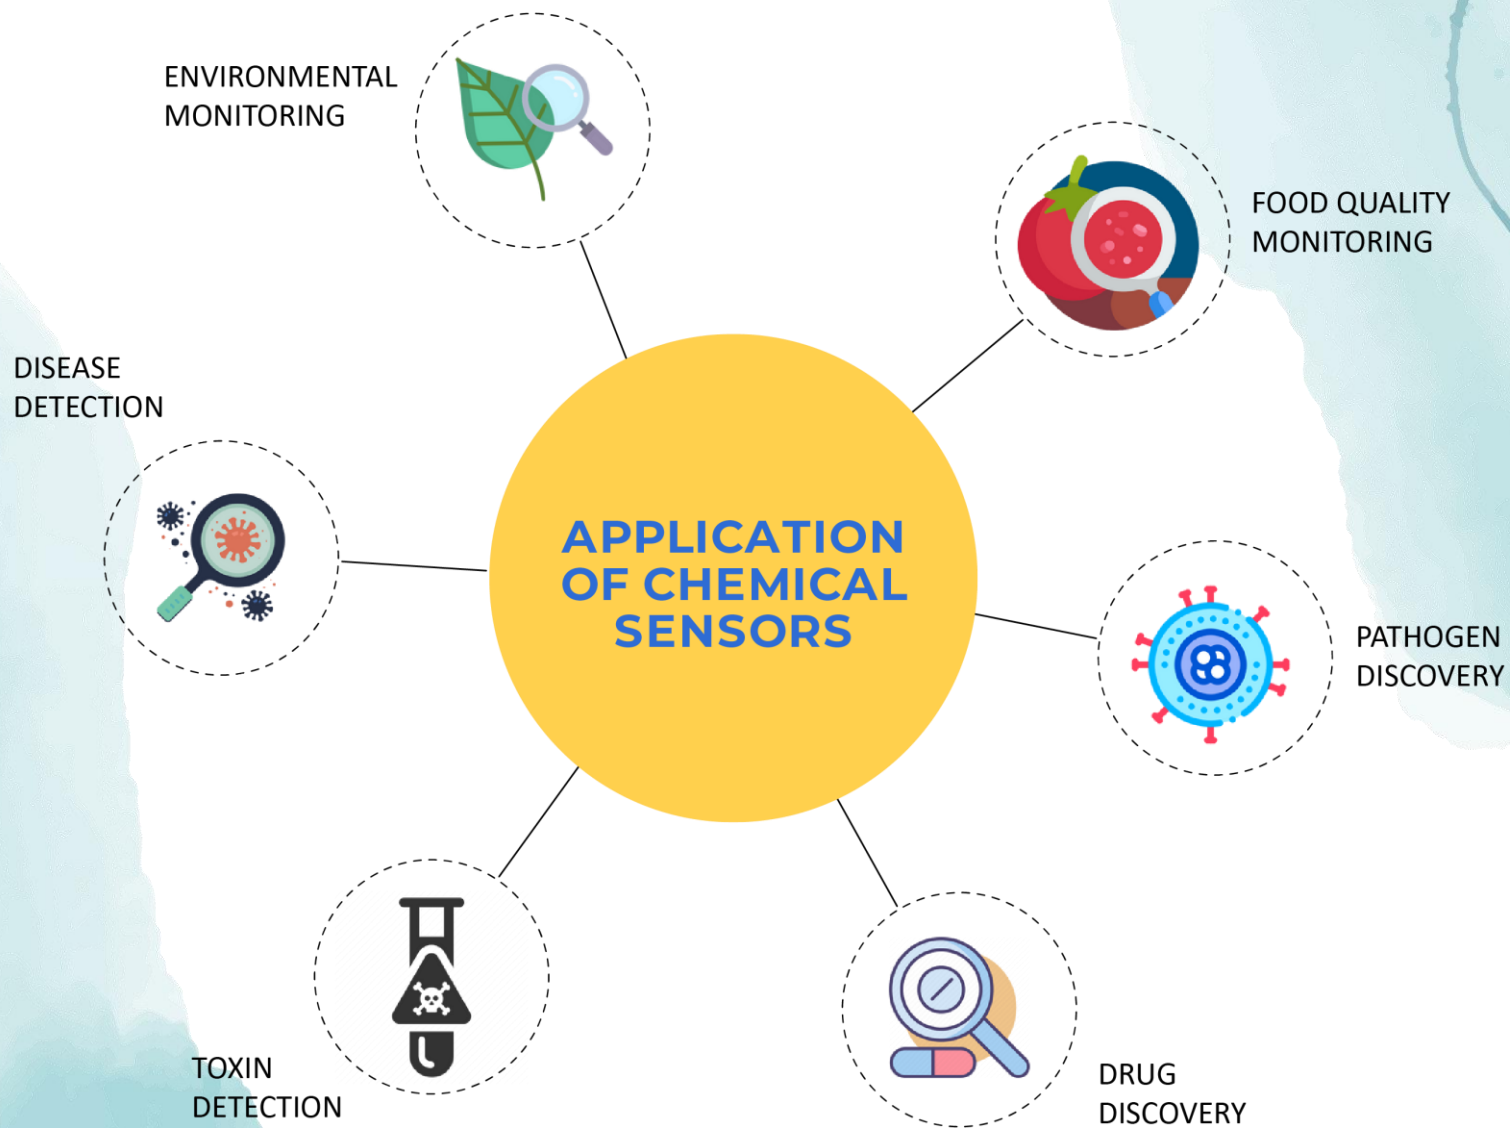

- ✓ **COBALT POLLUTION IN SOIL AND WATER**
- ✓ **MINING INDUSTRY, DOMESTIC AND INDUSTRIAL WASTEWATER, BURNING OF FOSSIL FUELS**
- ✓ **AFFECTS GROWTH AND YIELD OF AGRICULTURE CROP PLANTS**
- ✓ **POTENTIAL RISK TO FOOD SOURCES AND HUMAN HEALTH**
- ✓ **MONITOR EVEN TRACE AMOUNTS OF COBALT**

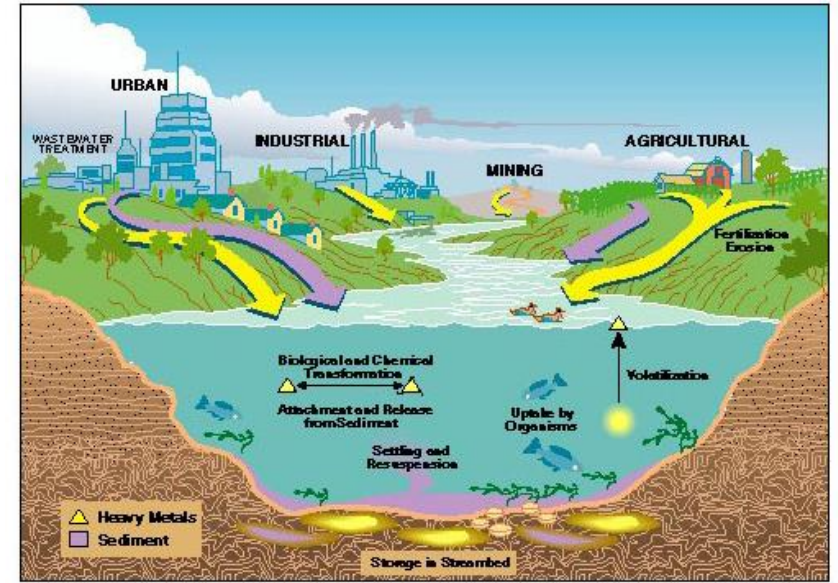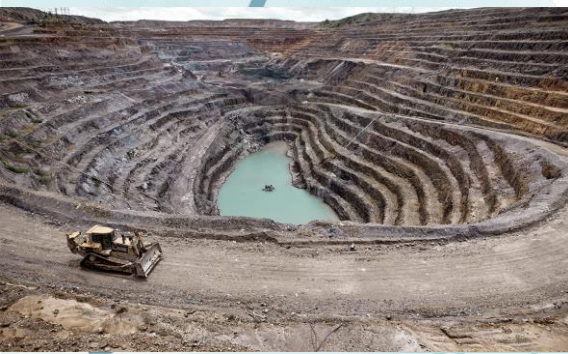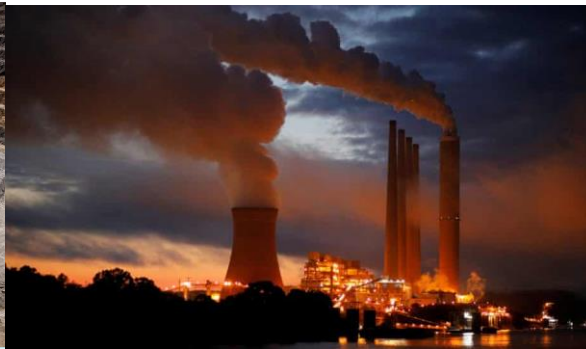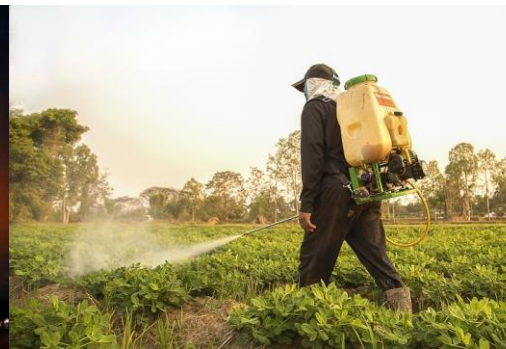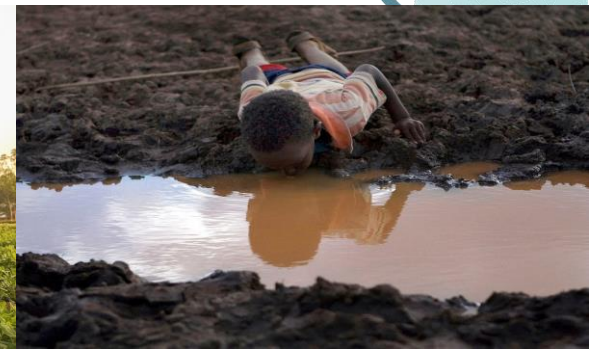

- ✓ **ATOMIC ABSORPTION SPECTROMETRY**
- ✓ **INDUCTIVELY COUPLED PLASMA MASS SPECTROMETRY**
- ✓ **FLUORESCENCE METHODS**
- ✓ **ELECTROCHEMICAL TECHNIQUES**
- ✓ **INTERFERENCE, SAMPLE PREPARATION, BEING TIME-CONSUMING, EXPENSIVE INSTRUMENTS, AND LOW SENSITIVITY.**
- ✓ **SIMPLE, RAPID, SENSITIVE, AND SPECIFIC METHOD FOR DETECTING  $\text{Co}^{2+}$**

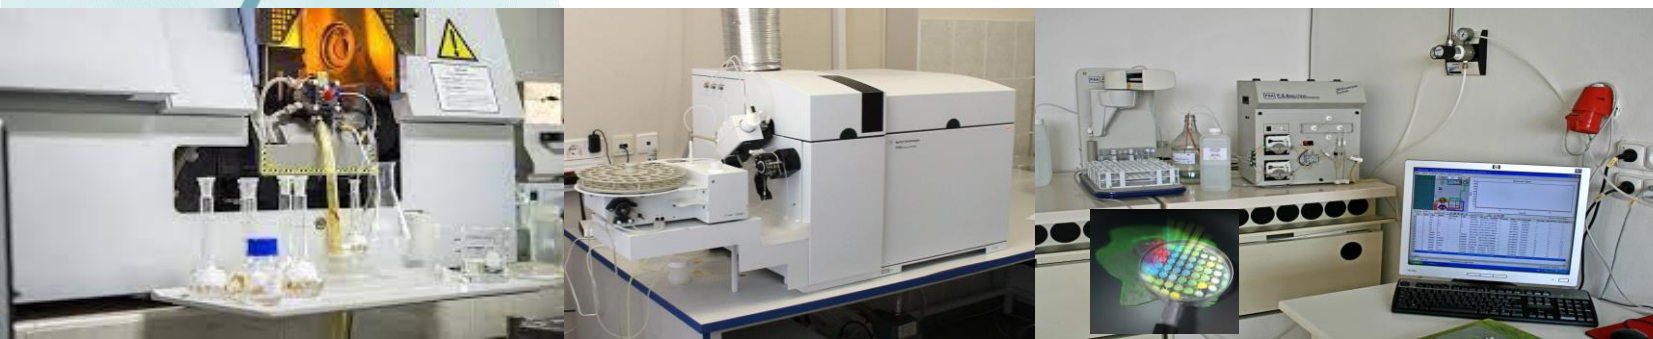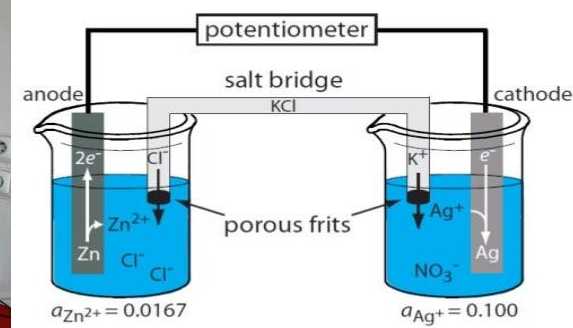

## CHEMICAL SENSOR: A SCHEME

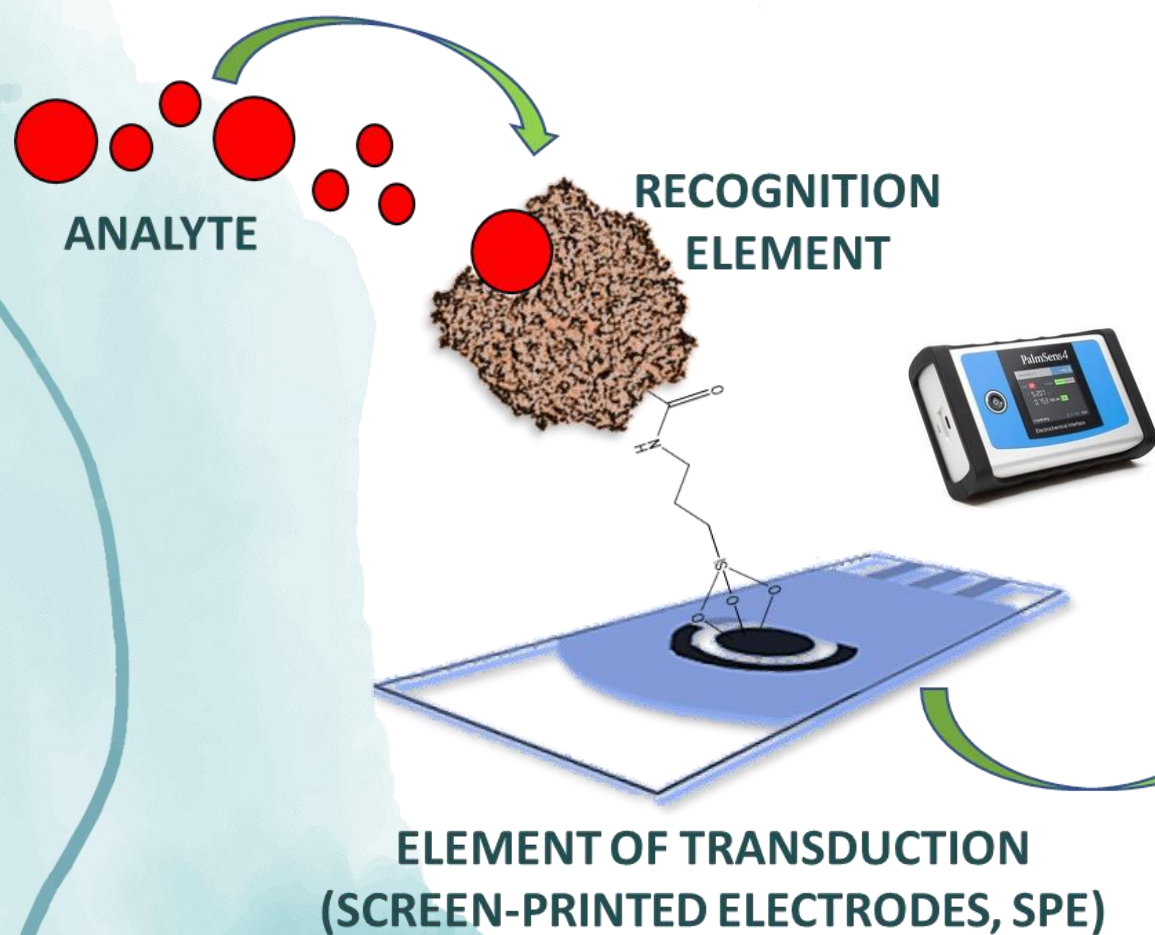

## OUTPUT (SENSOR RESPONSE)

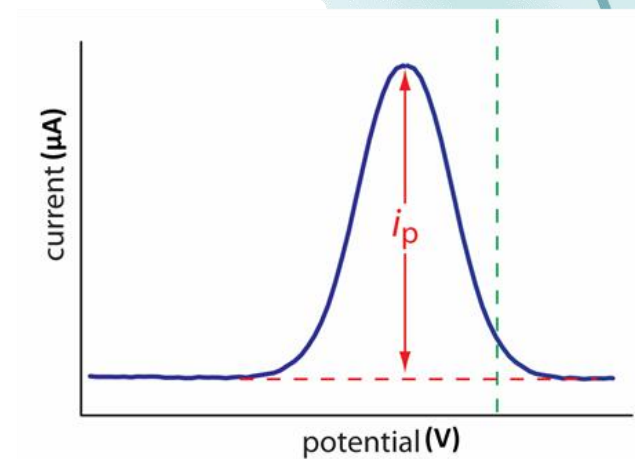

## RESPONSE EXAMPLE OF A VOLTAMMETRIC SENSOR

# AN HIGH SELECTIVE RECOGNITION ELEMENTS: ION IMPRINTED POLYMER (IIP)

## CHEMICAL SYNTHESIS

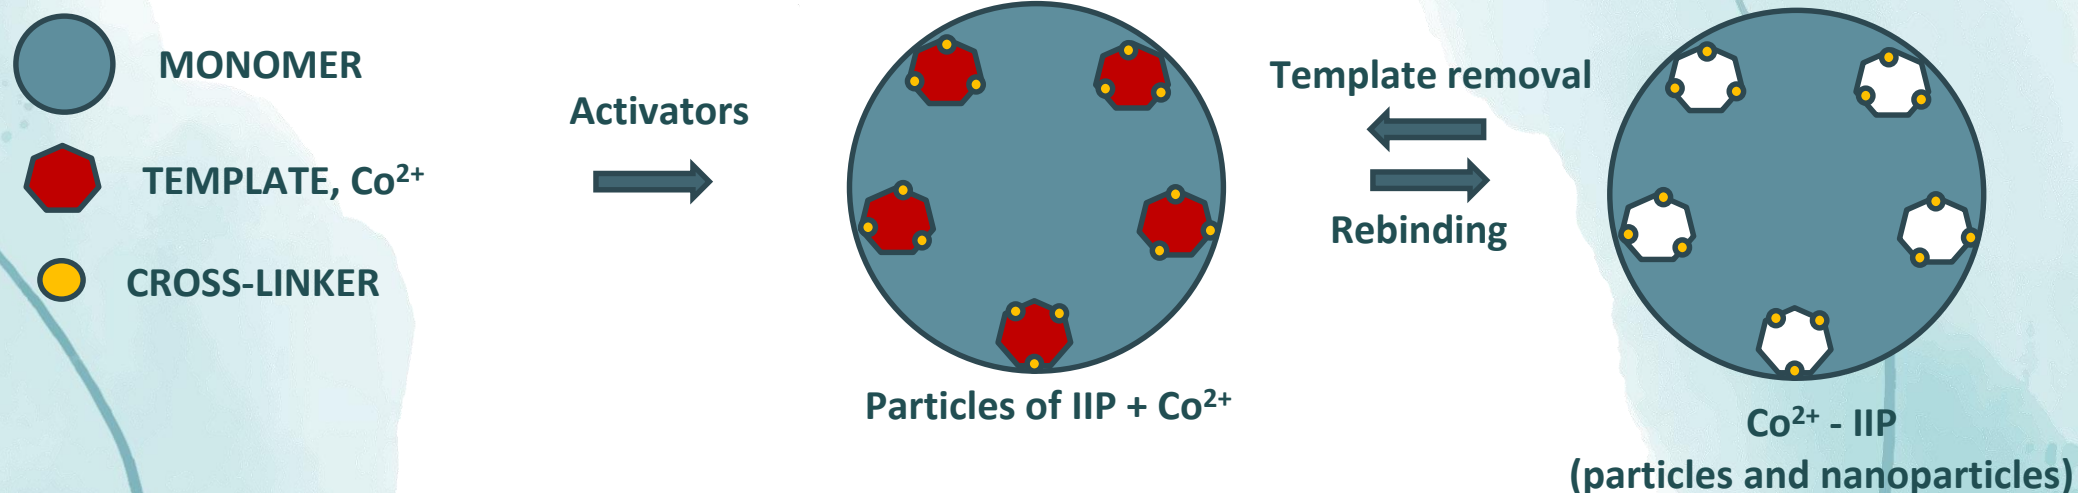

## ELECTROCHEMICAL SYNTHESIS

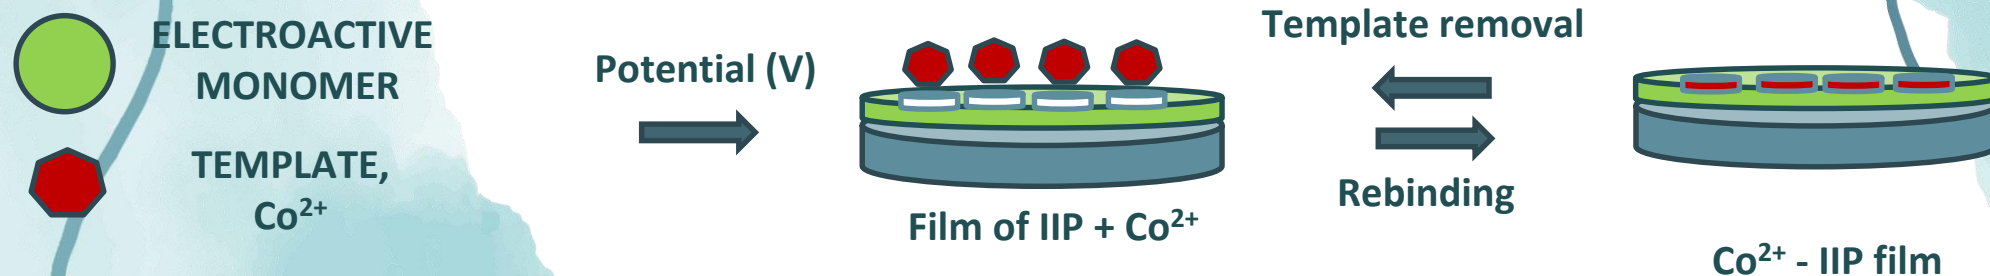

# DEVELOPMENT OF AN ELECTROCHEMICAL IMPEDIMETRIC SENSOR BASED ON AN ION IMPRINTED POLYMERIC FILM FOR THE DETERMINATION OF $\text{Co}^{2+}$ IONS IN WATER OF ENVIRONMENTAL INTEREST

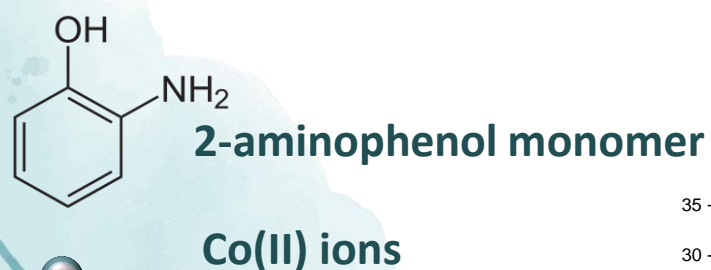

Drop-casting

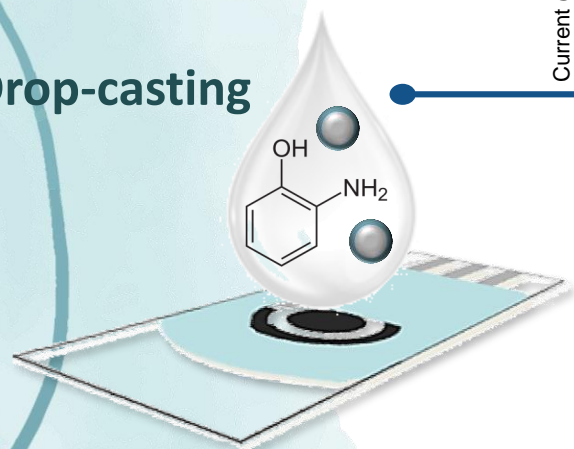

Screen-printed  
carbon electrodes,  
SPCE

Cyclic  
voltammetry

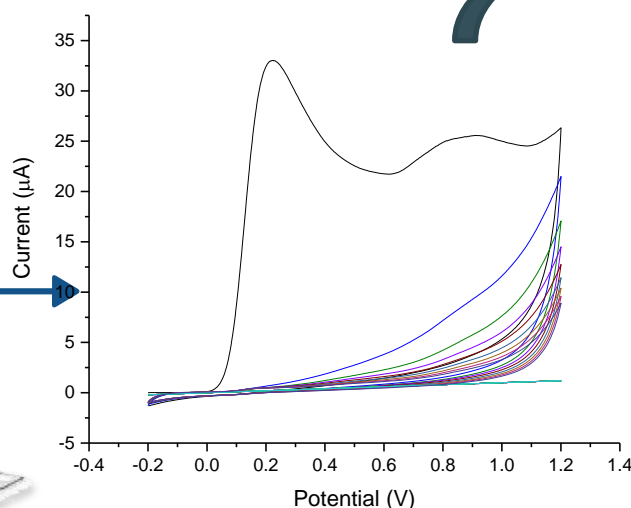

Washing step

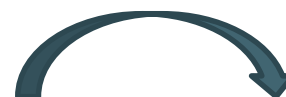

Electrochemical  
Impedance Spectroscopy

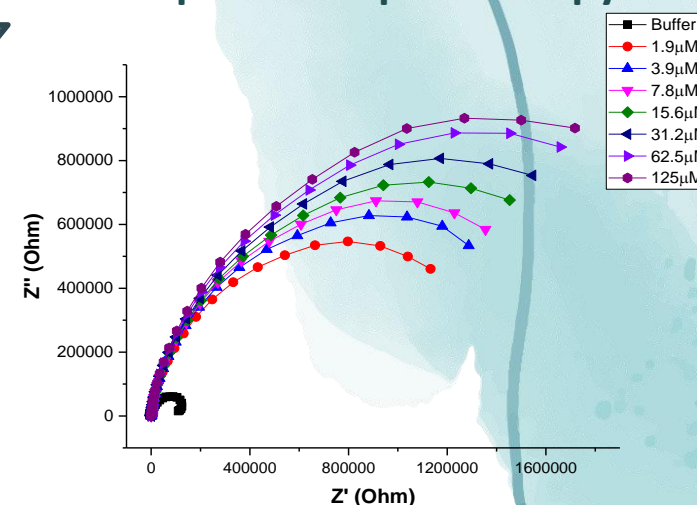

Electrochemical synthesis of ion  
imprinted polymeric film based  
on polyaminophenol (Co(II)-IIP  
film) and not imprinted  
polymeric film (NIP film, control)

Analytical performances of IIP film  
and NIP film

# METHODS

## Ion Imprinted Polymer (IIP) Preparation and Characterization

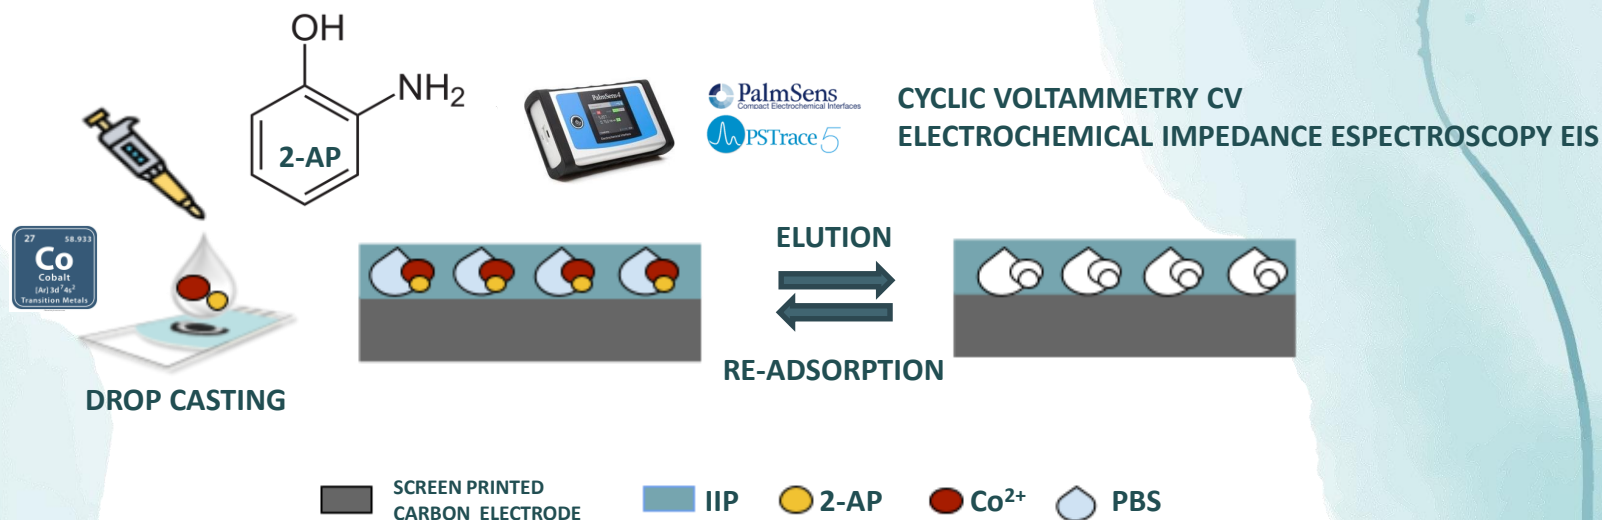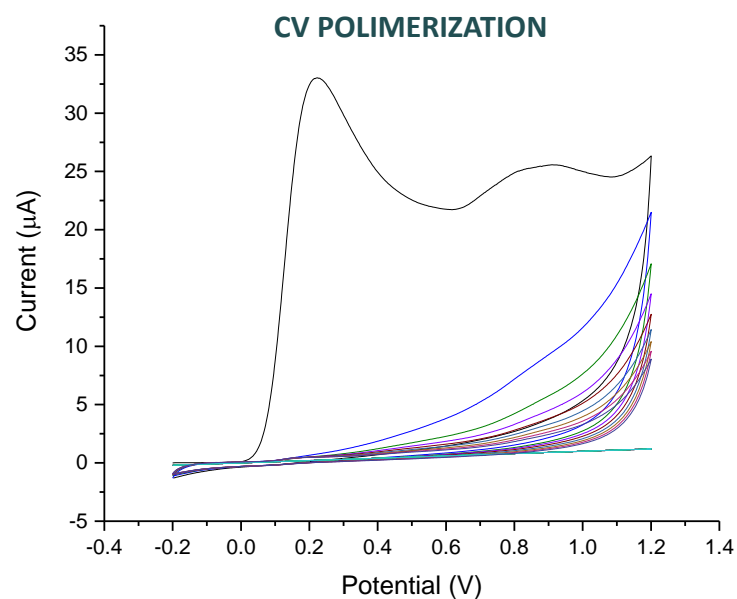

# OPTIMISATION BY MULTIVARIATE EXPERIMENTAL DESIGN

MODDE®  
SARTORIUS

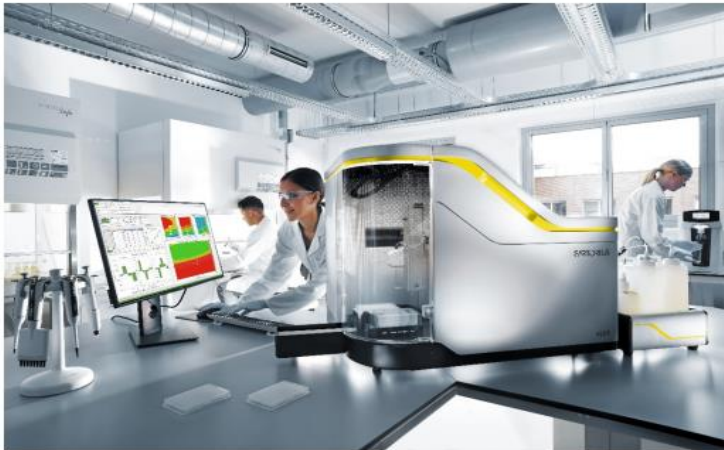

DoE

23 different experiments, 4  
affecting variables

Y = Sensitivity of IIP sensor

| Experiment number | Experiment name | Run Order | Incl/Excl | 2-AP concentration | CO <sup>2+</sup> concentration | Cycles | Time elution |
|-------------------|-----------------|-----------|-----------|--------------------|--------------------------------|--------|--------------|
| 1                 | N1              | 18        | Incl      | 1                  | 1                              | 10     | 10           |
| 2                 | N2              | 1         | Incl      | 2                  | 1                              | 10     | 10           |
| 3                 | N3              | 5         | Incl      | 1                  | 5                              | 10     | 10           |
| 4                 | N4              | 2         | Incl      | 2                  | 1                              | 30     | 10           |
| 5                 | N5              | 23        | Incl      | 1                  | 5                              | 30     | 10           |
| 6                 | N6              | 22        | Incl      | 2                  | 5                              | 30     | 10           |
| 7                 | N7              | 3         | Incl      | 1                  | 1                              | 10     | 25           |
| 8                 | N8              | 9         | Incl      | 1                  | 5                              | 10     | 25           |
| 9                 | N9              | 6         | Incl      | 2                  | 5                              | 10     | 25           |
| 10                | N10             | 8         | Incl      | 1                  | 1                              | 30     | 25           |
| 11                | N11             | 16        | Incl      | 2                  | 1                              | 30     | 25           |
| 12                | N12             | 11        | Incl      | 2                  | 5                              | 30     | 25           |
| 13                | N13             | 19        | Incl      | 1                  | 3                              | 20     | 17.5         |
| 14                | N14             | 15        | Incl      | 2                  | 3                              | 20     | 17.5         |
| 15                | N15             | 20        | Incl      | 1.5                | 1                              | 20     | 17.5         |
| 16                | N16             | 12        | Incl      | 1.5                | 5                              | 20     | 17.5         |
| 17                | N17             | 4         | Incl      | 1.5                | 3                              | 10     | 17.5         |
| 18                | N18             | 17        | Incl      | 1.5                | 3                              | 30     | 17.5         |
| 19                | N19             | 7         | Incl      | 1.5                | 3                              | 20     | 10           |
| 20                | N20             | 14        | Incl      | 1.5                | 3                              | 20     | 25           |
| 21                | N21             | 13        | Incl      | 1.5                | 3                              | 20     | 17.5         |
| 22                | N22             | 10        | Incl      | 1.5                | 3                              | 20     | 17.5         |
| 23                | N23             | 21        | Incl      | 1.5                | 3                              | 20     | 17.5         |

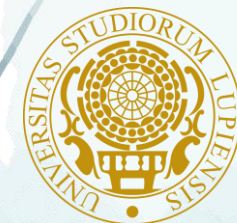

## CONCLUSIONS

- ✓ Adequate properties of selectivity and stability of the IIP films, compared with the yields obtained with other sensors.
- ✓ 44% of experiments with best fit comparing circuit model vs. experimental data.
- ✓ Sensitivity of Co(II)-IIP film sensor towards  $\text{Co}^{2+}$  ions in the range of concentration between 1.9 and 32.5  $\mu\text{mol L}^{-1}$  was 5 times higher than that reported for NIP film, revealing the goodness of imprinted process.

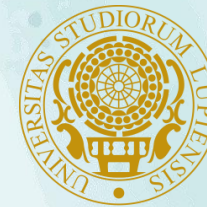

UNIVERSITÀ  
DEL SALENTO

L'Ateneo tra i due mari

# Thank you

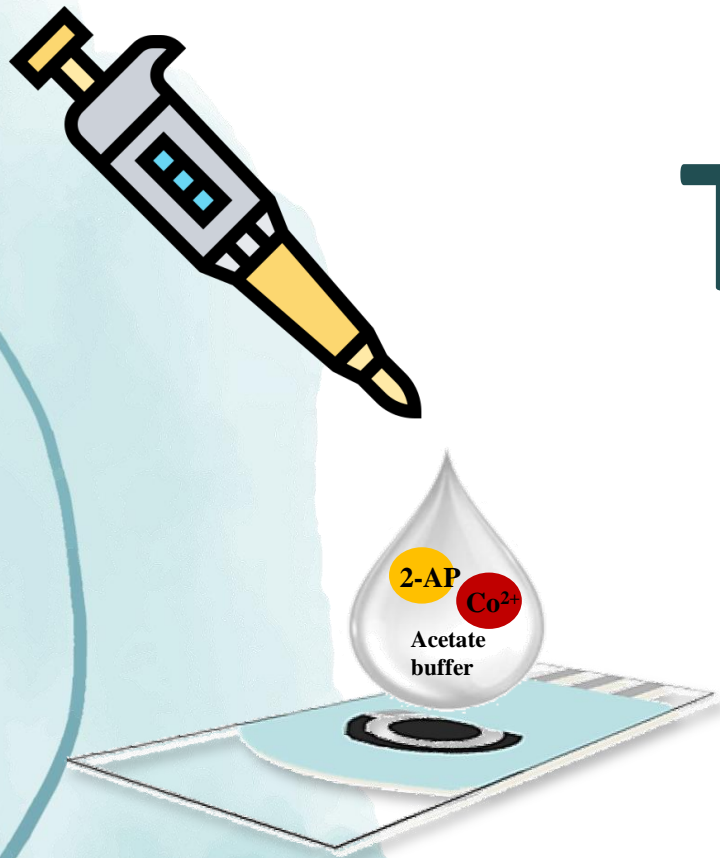

Supplement: s1 [file s1 › engproc-1671031-supplementary.pdf]
